# Supplementary material
Source: PubMed Central journal article supplement (PMC5994155)
Supplement: Supp_Table1.pdf [file Supp_Table1.pdf]

## Supplementary Data

SUPPLEMENTARY TABLE S1. COMPONENTS OF FRAIL INDEX FOR CLASSIFYING FRAILTY STATUS AMONG ADOLESCENT AND YOUNG ADULT CANCER SURVIVORS

| <i>Item description</i> | <i>Item source</i>                      | <i>Question</i>                                                                                                                                     | <i>Positive response</i>                |
|-------------------------|-----------------------------------------|-----------------------------------------------------------------------------------------------------------------------------------------------------|-----------------------------------------|
| Fatigue                 | PROMIS® Global Health Short Form        | In the past 7 days, how would you rate your fatigue on average?                                                                                     | 4 (severe) or 5 (very severe)           |
| Resistance              | SF-36                                   | Climbing several flights of stairs, does your health now limit you a lot, limit you a little, or not limit you at all?                              | 1 (yes a lot) or 2 (yes a little)       |
| Ambulation              | PROMIS® Global Health Short Form        | To what extent are you able to carry out your everyday physical activities such as walking, climbing stairs, carrying groceries, or moving a chair? | 1 (none), 2 (a little), or 3 (moderate) |
| Illness                 | UNC HR/CRC Comorbidity Assessment       | Have you EVER been told by a doctor or other health professional that you have Arthritis?                                                           | ≥ 5 positive responses                  |
|                         |                                         | Have you EVER been told by a doctor or other health professional that you have Asthma?                                                              |                                         |
|                         |                                         | Have you EVER been told by a doctor or other health professional that you have COPD?                                                                |                                         |
|                         |                                         | Have you EVER been told by a doctor or other health professional that you have Diabetes?                                                            |                                         |
|                         |                                         | Have you EVER been told by a doctor or other health professional that you have Hypertension?                                                        |                                         |
|                         |                                         | Have you EVER been told by a doctor or other health professional that you have Kidney Disease?                                                      |                                         |
|                         |                                         | Have you EVER been told by a doctor or other health professional that you have Congestive Heart Failure?                                            |                                         |
|                         |                                         | Have you EVER been told by a doctor or other health professional that you have Angina?                                                              |                                         |
|                         |                                         | Have you EVER been told by a doctor or other health professional that you have had a myocardial infarction or heart attack?                         |                                         |
|                         |                                         | Have you EVER been told by a doctor or other health professional that you have had a Stroke?                                                        |                                         |
| weight loss             | UNC HR/CRC Height and Weight Assessment | Reported current weight-reported weight 1 year ago                                                                                                  | >5% weight loss in the last year        |

Frailty phenotype defined as ≥3 positive responses, prefrail = 2, robust <2.

PROMIS®, Patient-Reported Outcomes Measurement Information System; UNC HR/CRC, University of North Carolina Health Registry/Cancer Survivorship Cohort.
